# Supplementary material for: Up-regulation of SLC27A2 suppresses the proliferation and invasion of renal cancer by down-regulating CDK3-mediated EMT
Source: PubMed Central journal article supplement (PMC9352701; doi:10.1038/s41420-022-01145-8), 2022-08-04

Figure 3A

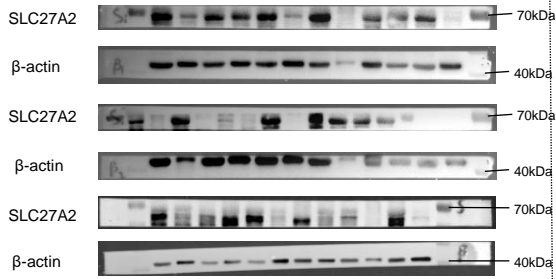

Figure 3F

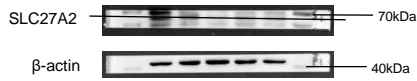

Figure 4A

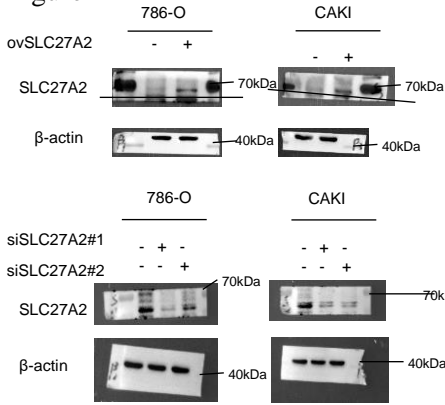

Figure 4F

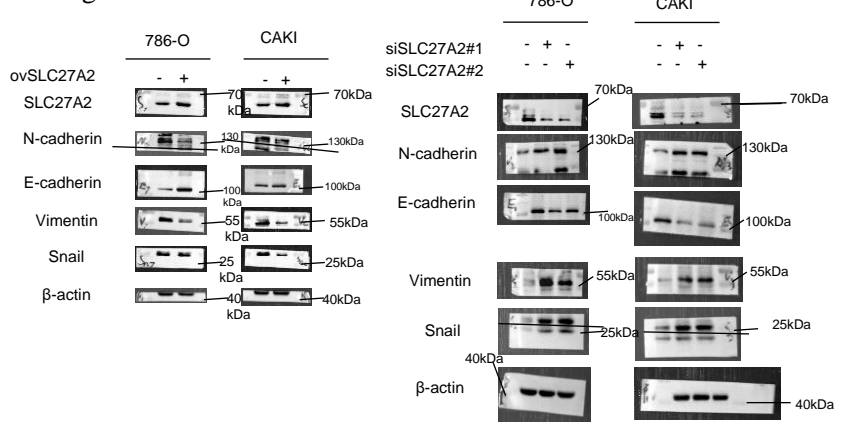

Figure 5F

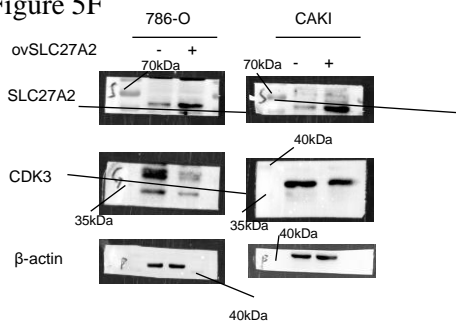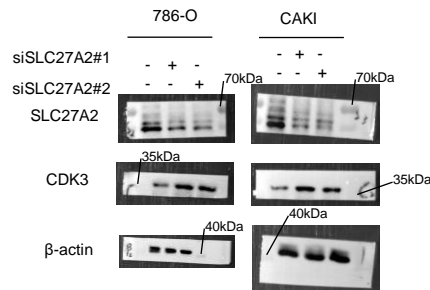

Figure 6C

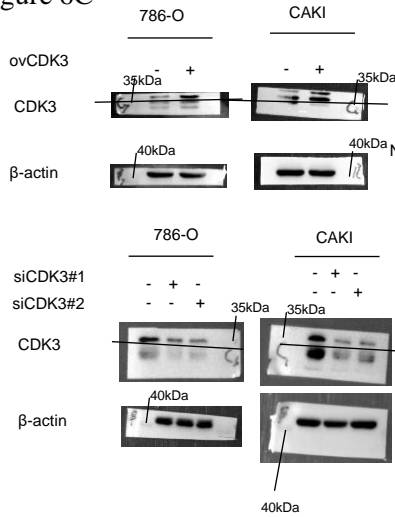

Figure 6H

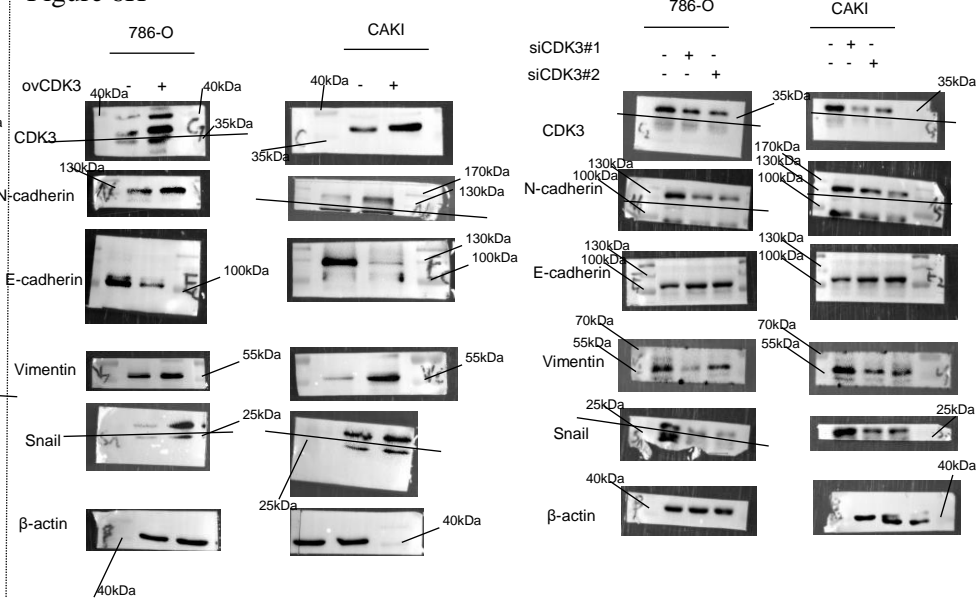

Supplement: 41420_2022_1145_MOESM6_ESM.pdf [file 41420_2022_1145_MOESM6_ESM.pdf]
